# Supplementary figures and images for: Alterations in Metabotropic Glutamate Receptor 1α and Regulator of G Protein Signaling 4 in the Prefrontal Cortex in Schizophrenia
Source: Atypon-hosted journal article supplement (doi:10.1176/appi.ajp.2010.10030318), 2010-10-02

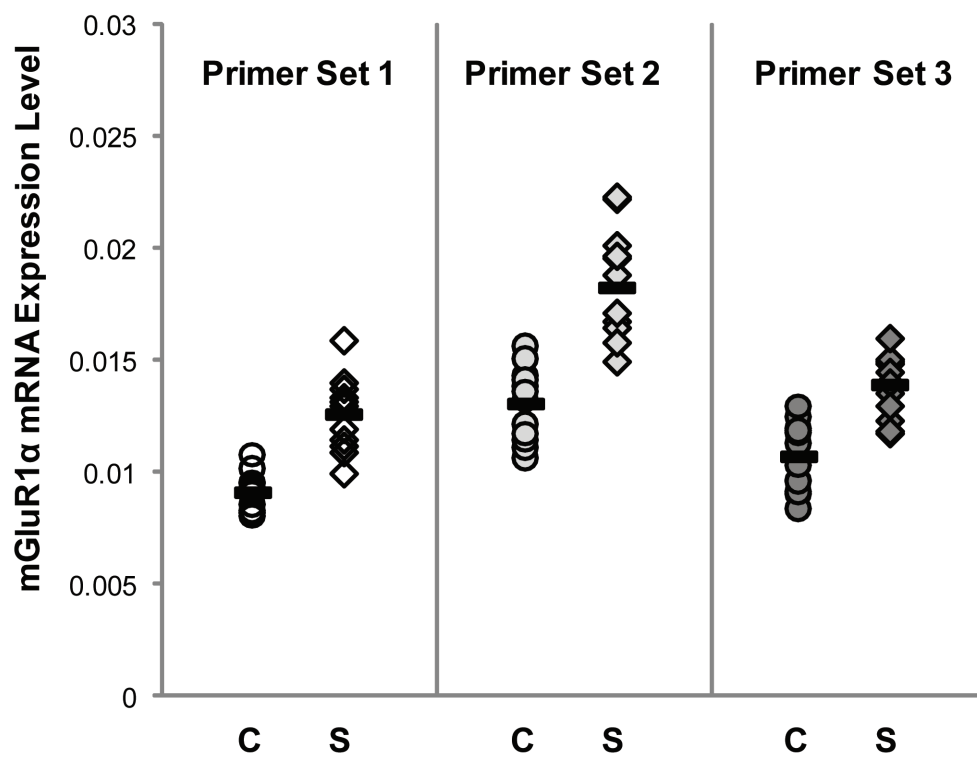

Supplement: ajp_167_12_1489_01.pdf [file ajp_167_12_1489_01.pdf]
